# Supplementary material for: Development of selective catalysts for hydroprocessing of phenol production by-products — hydroquinone and catechol
Source: Research Square preprint supplement (doi:10.21203/rs.3.rs-7609053/v1), 2025-10-14
Supplement: Supplementary file 1 [file 9011a883f6bca8bf49eb0e1d.docx]

Development of selective catalysts for hydroprocessing of phenol production by-products — hydroquinone and catechol

Mariyam Mukhtarova,a* Maria A. Golubeva,a Kirill I. Chernyshev,b Alexander L. Vasiliev,b,c Dzhamalutdin N. Ramazanova, Oleg G. Sinyashin,d Anton L. Maximova

aA. V. Topchiev Institute of Petrochemical Synthesis, Russian Academy of Sciences, 119991 Moscow, Russia

bNational Research Center “Kurchatov Institute”, Moscow 123182, Russia

cMoscow Institute of Physics and Technology (National Research University), 141701 Moscow, Russia

dFederal Research Center Kazan Scientific Center RAS, 420111 Kazan, Russia

*Corresponding author: Mariyam Mukhtarova [mukhtarova@ips.ac.ru](mailto:mukhtarova@ips.ac.ru)


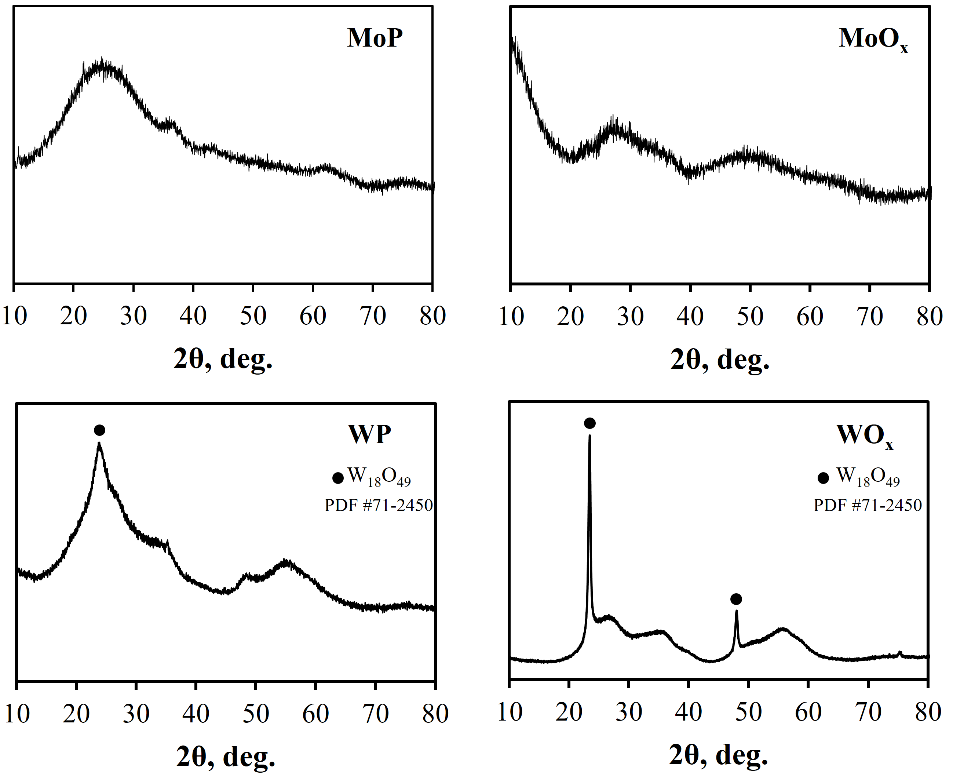


**Fig. S1** XRD patterns of the catalysts, obtained in situ during hydroprocessing of a mixture of phenol, hydroquinone, and catechol. Reaction conditions: 300 °C, 5 MPa H2, 4 h.

**Table S1.** The XPS data of the MoP and WP, obtained in situ during hydroprocessing of a mixture of phenol, hydroquinone, and catechol. Reaction conditions: 300 °C, 5 MPa H2, 4 h.

| **Catalyst** | **Region** | **State** | **Binding energy, eV** | **Content, %** |
| --- | --- | --- | --- | --- |
| MoP | Moδ+ | 3d5/2 | 230.0 | 5 |
| 3d3/2 | 233.1 |
| Mo4+ | 3d5/2 | 230.7 | 18 |
| 3d3/2 | 233.8 |
| Mo6+ | 3d5/2 | 232.5 | 77 |
| 3d3/2 | 235.6 |
| Pδ- | 2p3/2 | 130.0 | 10 |
| 2p1/2 | 130.9 |
| P5+ | 2p3/2 | 130.8 | 90 |
| 2p1/2 | 131.7 |
| WP | Wδ+ | 4f7/2 | 33.0 | 8 |
| 4f5/2 | 35.1 |
| W4+ | 4f7/2 | 34.0 | 34 |
| 4f5/2 | 36.2 |
| W6+ | 4f7/2 | 34.4 | 58 |
| 4f5/2 | 36.5 |
| Pδ- | 2p3/2 | 129.9 | 13 |
| 2p1/2 | 130.7 |
| P5+ | 2p3/2 | 131.1 | 87 |
| 2p1/2 | 132.0 |

**Table S2.** TheXPS data of the MoOx and WOx, obtained in situ during hydroprocessing of a mixture of phenol, hydroquinone, and catechol. Reaction conditions: 300 °C, 5 MPa H2, 4 h.

| **Catalyst** | **Region** | **State** | **Binding energy, eV** | **Content, %** |
| --- | --- | --- | --- | --- |
| MoOx | Mo4+ | 3d5/2 | 230.2 | 24 |
| 3d3/2 | 233.3 |
| Mo5+ | 3d5/2 | 232.0 | 16 |
| 3d3/2 | 235.1 |
| Mo6+ | 3d5/2 | 232.0 | 60 |
| 3d3/2 | 235.2 |
| Mo-O | 1s | 529.9 | 34 |
| OVs | 530.5 | 17 |
| Mo-OH | 531.2 | 39 |
| WOx | W4+ | 4f7/2 | 34.3 | 15 |
| 4f5/2 | 36.4 |
| W5+ | 4f7/2 | 35.1 | 10 |
| 4f5/2 | 37.3 |
| W6+ | 4f7/2 | 35.3 | 75 |
| 4f5/2 | 37.5 |
| W-O | 1s | 529.7 | 33 |
| OVs | 530.3 | 11 |
| W-OH | 530.5 | 56 |


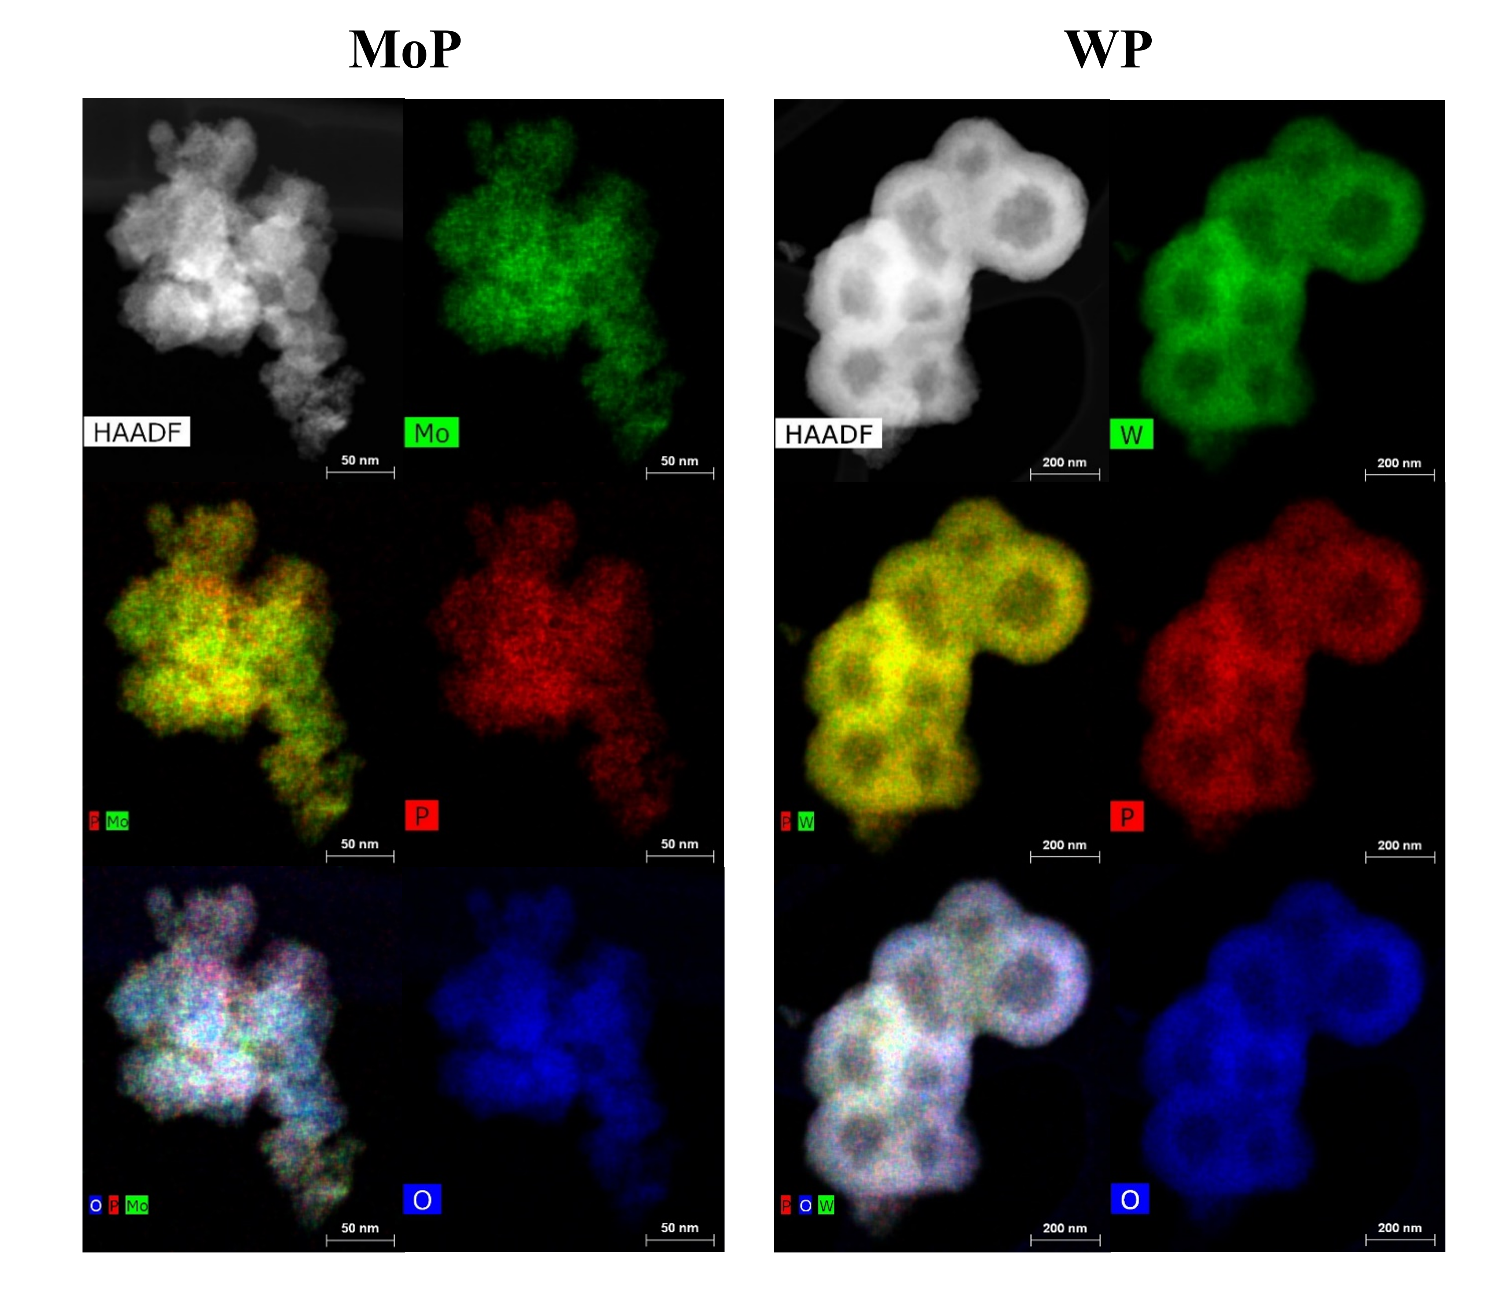


**Fig. S2** The elemental maps of the MoP and WP, obtained in situ during hydroprocessing of a mixture of phenol, hydroquinone, and catechol. Reaction conditions: 300 °C, 5 MPa H2, 4 h.


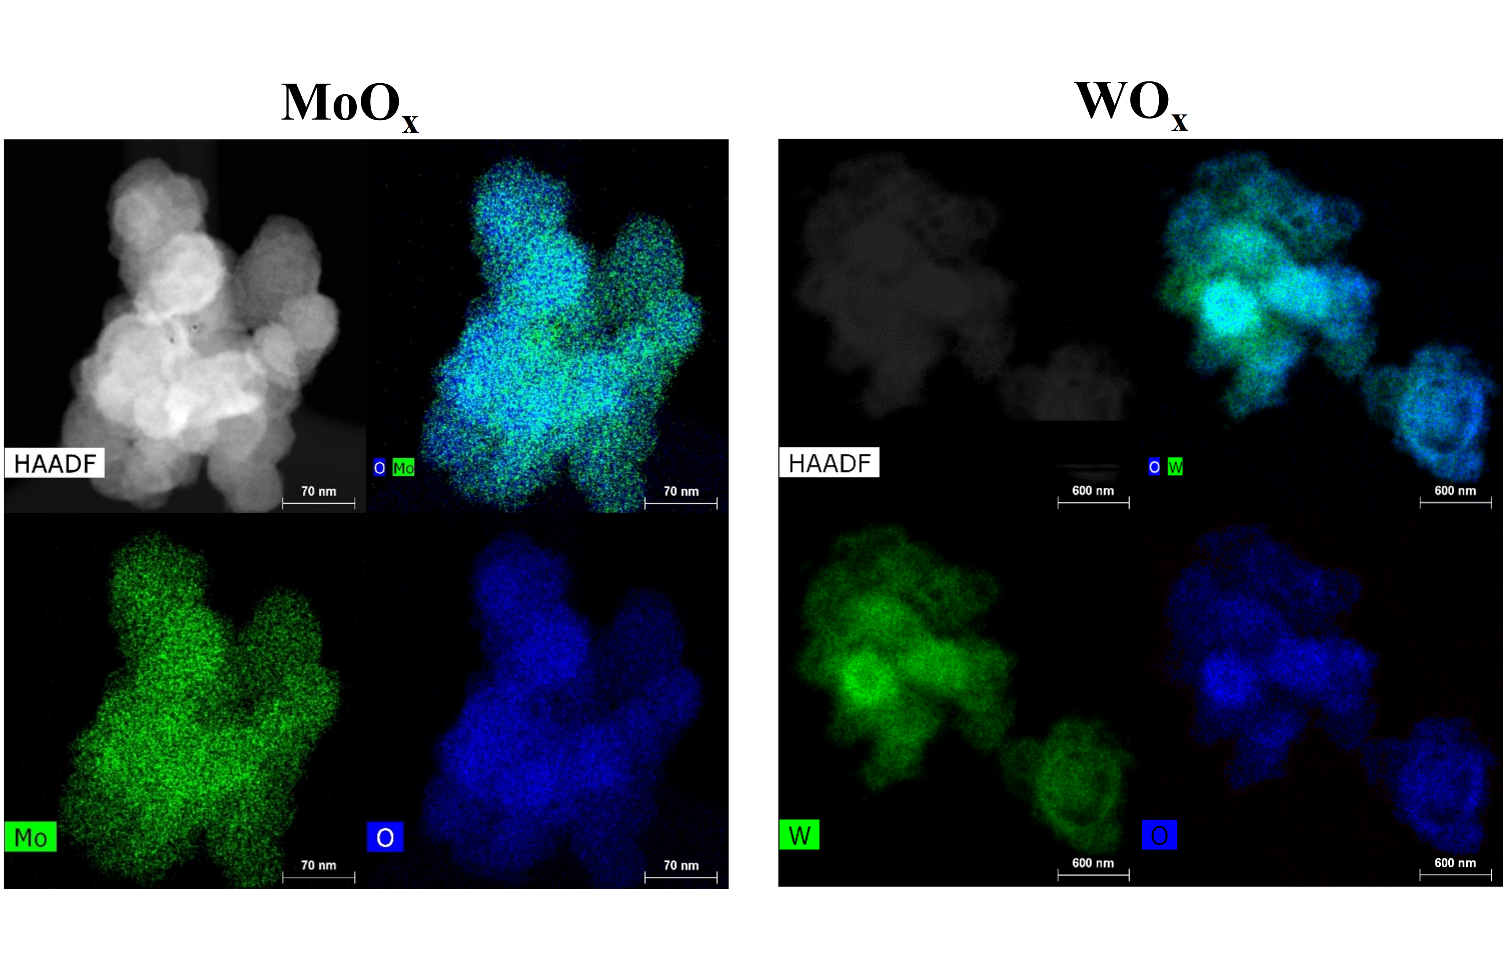


**Fig. S3** The elemental maps of the MoOx and WOx, obtained in situ during hydroprocessing of a mixture of phenol, hydroquinone, and catechol. Reaction conditions: 300 °C, 5 MPa H2, 4 h.
